1 **Comparative genomics of *Acinetobacter baumannii* and therapeutic bacteriophages from a**  
2 **patient undergoing phage therapy**

3  
4 Adriana Hernandez<sup>1,3,#</sup>, Mei Liu<sup>1,3,#</sup>, James Clark<sup>1,3</sup>, Tram Le<sup>1,3</sup>, Biswajit Biswas<sup>4</sup>, Kimberly A.  
5 Bishop-Lilly<sup>4</sup>, Matthew Henry<sup>4,8</sup>, Javier Quinones<sup>4,8,9</sup>, Theron Hamilton<sup>7</sup>, Robert Schooley<sup>5</sup>,  
6 Scott Salka<sup>6</sup>, Ry Young<sup>1,3</sup>, Jason Gill<sup>1,2\*</sup>

7  
8  
9  
10 <sup>1</sup>Center for Phage Technology, Texas A&M AgriLife Research and Texas A&M University,  
11 College Station, Texas, USA

12 <sup>2</sup>Department of Animal Science, Texas A&M University, College Station, Texas, USA

13 <sup>3</sup>Department of Biochemistry and Biophysics, Texas A&M University, College Station, Texas,  
14 USA

15 <sup>4</sup>Biological Defense Research Directorate, Naval Medical Research Center, Frederick, Maryland,  
16 USA

17 <sup>5</sup>Department of Medicine, University of California, San Diego, La Jolla, California, USA

18 <sup>6</sup>AmpliPhi Biosciences (now Armata Pharmaceuticals), Marina Del Rey, California, USA

19 <sup>7</sup>Naval Air Station, 6801 Roosevelt Blvd, Jacksonville, FL, USA

20  
21 <sup>8</sup>The Geneva Foundation, 917 Pacific Ave, Suite 600, Tacoma, WA, USA

22  
23 <sup>9</sup>Current address: MilliporeSigma, 14920 Broschart Rd, Rockville, MD, USA

24  
25  
26 # Co-first author

27 \*Corresponding author

28  
29  
30  
31  
32  
33  
34  
35 \*Corresponding author: [jason.gill@tamu.edu](mailto:jason.gill@tamu.edu)

36  
37  
38 Keywords: bacteriophage, phage therapy, *Acinetobacter baumannii*, phage resistance, antibiotic  
39 resistance

42 **Abstract**

43

44 In 2016, a 68-year-old patient with a disseminated multi-drug resistant *Acinetobacter baumannii*  
45 infection was treated using lytic bacteriophages in one of the first modern human clinical uses of  
46 phage therapy in the United States. Due to the emergency nature of the treatment there was little  
47 time to thoroughly characterize the phages used in this intervention or the pathogen itself. Here  
48 we report the genomes of the nine phages used for treatment and three strains of *A. baumannii*  
49 isolated prior to and during treatment. The eight phages used in the initial treatment were found  
50 to be a group of closely related T4-like myophages; the ninth phage, AbTP3Φ1, was found to be  
51 an unrelated Fri1-like podophage. Analysis of 19 *A. baumannii* isolates collected before and  
52 during phage treatment showed that resistance to the T4-like phages appeared as early as two  
53 days following the start of treatment. Three *A. baumannii* strains (TP1, TP2 and TP3) collected  
54 before and during treatment were sequenced to closure, and all contained a 3.9 Mb chromosome  
55 of sequence type 570 with a KL116 capsule locus and identical 8.7 kb plasmids. Phage-  
56 insensitive mutants of *A. baumannii* strain TP1 were generated *in vitro* and the majority of  
57 identified mutations were located in the bacterial capsule locus. The presence of the same  
58 mutation in both the *in vitro* mutants and in phage-insensitive isolates TP2 and TP3, which  
59 evolved *in vivo* during phage treatment, indicate that *in vitro* investigations can produce results  
60 that are relevant and predictive for the *in vivo* environment.

61

## 62 Introduction

63

64 The Gram-negative bacterium *Acinetobacter baumannii* is recognized as one of the most  
65 important pathogens in healthcare-associated infections, particularly with ventilator-associated  
66 pneumonia and catheter associated infections (Dijkshoorn, Nemec et al. 2007, Peleg, Seifert et  
67 al. 2008, Lee, Lee et al. 2017). This is especially true for carbapenem-resistant *A.*  
68 *baumannii*, which caused 8,500 infections and 700 deaths in the U.S. in 2017 alone (CDC  
69 2019). Several characteristics of this pathogen impact treatment regimens and outcomes,  
70 including the increased prevalence of multidrug-resistant (MDR) strains, environmental  
71 persistence due to its desiccation and disinfectant resistance, biofilm formation, and motility  
72 (Roca, Espinal et al. 2012, Harding, Hennon et al. 2018). This results in hampered clinical  
73 intervention strategies and increased risks of reinfection and outbreaks (Chusri,  
74 Chongsuvivatwong et al. 2014). As cases of resistant infections are more prevalent and very few  
75 new antibiotics are available, the use of bacteriophages (phages) to treat and/or control  
76 multidrug-resistant infections is being reconsidered as an alternative strategy for therapeutic and  
77 prophylactic applications (Young and Gill 2015, Nobrega, Vlot et al. 2018, Gordillo Altamirano  
78 and Barr 2019)

79 In the modern era, the first published emergency intervention using phage in treating a  
80 systemic multi-drug-resistant *A. baumannii* infection in the US was the well-publicized  
81 “Patterson case” in 2016 (Schooley, Biswas et al. 2017). Clinical interventions using phage  
82 therapy to combat MDR bacterial infections have increased significantly in the past several  
83 years, with successful phage treatment outcomes reported in a number of case studies involving  
84 MDR *Pseudomonas aeruginosa*, *Staphylococcus aureus*, and *Escherichia coli* (Aslam, Lampley  
85 et al. 2020). These case studies have been encouraging in terms of clinical outcome, but in-depth  
86 examination of the phage-host interaction during treatment and their implications for phage  
87 efficacy remains an area of active study.

88 In principle, the effectiveness of the phage treatment depends on the ability of phage  
89 to localize to and persist in the infected tissue and propagate lytically. During this process, both  
90 the phages and their bacterial hosts replicate and evolve, potentially reducing the ability of the  
91 phages to clear the infection. In the 2016 *A. baumannii* clinical intervention, emergence of phage  
92 resistance was reported 8 days following the initiation of phage treatment (Schooley, Biswas et  
93 al. 2017). Due to the rapid response required for the 2016 clinical intervention, both the *A.*  
94 *baumannii* pathogen and the phages used in treatment were largely uncharacterized. Here we  
95 examine the genomics of the therapeutic phages, the emergence of phage resistance during  
96 treatment, and the *in vivo* evolution of the pathogen with complete genomes of three *A.*  
97 *baumannii* strains isolated before and during phage therapy. Genetic changes responsible for  
98 phage resistance developed *in vivo* are compared to resistance developed *in vitro*, and the  
99 implications for optimizing phage therapeutic interventions are discussed.

100

101

## 102 **Materials and Methods**

103

### 104 ***A. baumannii* clinical isolates**

105 As reported previously (Schooley, Biswas et al. 2017), *A. baumannii* clinical isolates were  
106 isolated from multiple drains, peritoneal fluid, and respiratory secretions of the patient receiving  
107 phage treatment at the UCSD Clinical Microbiology Laboratory. Strain TP1 was isolated from  
108 peritoneal drain on Feb 10, 2016, strain TP2 and TP3 were isolated from a pancreatic drain on  
109 March 21 and March 23, 2016, respectively. All *Acinetobacter* strains were routinely cultured  
110 on tryptic soy broth (TSB, 17g/L Bacto tryptone, 3 g/L soytone, 2.5 g/L D-glucose, 5 g/L NaCl,  
111 2.5 g/L disodium phosphate) or Tryptic Soy Agar (TSB plus 1.5% Bacto agar, w/v). For all  
112 plaque assays, a 0.5% TB agar overlay (10 g/L tryptone, 5 g/L NaCl and 0.5% Bacto agar) was  
113 inoculated with 0.1 ml of a fresh overnight TSB culture of host and poured over TSA plates. All  
114 strains were grown at 37 °C.

115

### 116 **Phage propagation, whole genome sequencing and characterization**

117 Except for AB-Navy71, the isolation and propagation of all phages used in three cocktails, ΦPC,  
118 ΦIV, and ΦIVB were conducted using the soft agar overlay method (Adams 1959), and were  
119 described in detail previously (Schooley, Biswas et al. 2017). Phage AB-Navy71 was purchased  
120 from the Leibniz Institute DSMZ ([www.dsmz.de](http://www.dsmz.de)) as phage name vB-GEC\_Ab-M-G7  
121 (DMS25639). Phage DNA was extracted using the Promega Wizard DNA extraction system  
122 following a modified protocol as previously described (Summer 2009). The DNA was prepared  
123 for sequencing with 550 bp inserts using a TruSeq Nano kit and sequenced as paired end 250 bp  
124 reads by Illumina MiSeq with V2 500-cycle chemistry. Reads were checked for quality using  
125 FastQC ([www.bioinformatics.babraham.ac.uk/projects/fastqc](http://www.bioinformatics.babraham.ac.uk/projects/fastqc)) and the genome was assembled  
126 using SPAdes v3.5.0 (Bankevich, Nurk et al. 2012). The assembled contigs were completed by  
127 running PCR amplifying the region covering the contig ends, sequencing the resulting PCR  
128 products (see Supplementary Table S1 for PCR primers used), followed by manual verification.  
129 Annotation of the assembled genome was conducted using tools in Galaxy hosted by  
130 <https://cpt.tamu.edu/galaxy-pub> (Afgan, Baker et al. 2018). Genes were identified using  
131 Glimmer v3 (Delcher, Harmon et al. 1999) and MetaGeneAnnotator v1.0 (Noguchi, Taniguchi et  
132 al. 2008), and tRNAs were identified using ARAGORN v2.36 (Laslett and Canback 2004). The  
133 identified genes were assigned putative functions using default settings of BLAST v2.9.0 against  
134 the nr and SwissProt databases (Camacho, Coulouris et al. 2009, UniProt Consortium 2018),  
135 InterProScan v5.33 (Jones, Binns et al. 2014), and TMHMM v2.0 (Krogh, Larsson et al. 2001).  
136 For comparative purposes, whole genome DNA sequence similarity was conducted using  
137 ProgressiveMauve v2.4 (Darling, Mau et al. 2010). Genome maps were made using the linear  
138 genome plot tool, and genome comparison maps were made using X-vis, a custom XMFA  
139 visualization tool developed by the CPT. Phylogenetic tree of the phage tail fiber proteins was  
140 constructed by aligning the protein sequences with MUSCLE (Edgar 2004), and using the  
141 pipeline available at <https://www.phylogeny.fr/> (Dereeper, Guignon et al. 2008) to run the  
142 maximum likelihood analysis (Anisimova and Gascuel 2006). The tree was plotted using  
143 TreeDyn (Chevenet, Brun et al. 2006). Tail fiber protein multiple sequence alignment was  
144 illustrated using Clustal Omega under default settings (Madeira, Park et al. 2019). Except web-  
145 based analysis, most analyses were conducted via the CPT Galaxy and WebApollo interfaces  
146 (Dunn, Unni et al. 2019, Jalili, Afgan et al. 2020, Ramsey, Rasche et al. 2020) under default  
147 settings (<https://cpt.tamu.edu/galaxy-pub>).

148  
149

### 150 **Determination of phage sensitivity on clinical strains**

151 Phage sensitivity of *A. baumannii* clinical isolates was determined by spotting serially diluted  
152 phage suspensions onto bacterial lawns produced by the soft agar overlay method (Adams 1959).  
153 Aliquots of 10 µl serially diluted phage were spotted onto the agar overlay plate, which was  
154 incubated at 37°C for 18-24 h to observe plaque formation. All assays were performed in  
155 triplicate.

156

### 157 **Phenotype microarrays**

158 Omnilog Phenotype Microarray panels 1-20 for bacterial strains and Dye Mix D (Biolog;  
159 Hayward, CA) were used for phenotypic profiling of pancreatic drainage isolates TP1 and TP3.  
160 Each strain was assayed with three independent replicates for 48 hours following manufacturer's  
161 instructions. Area under the curve (AUC) values were analyzed using the R package opm (Vaas,  
162 Sikorski et al. 2013).

163

### 164 **Genome sequencing and genome analysis of *A. baumannii* TP1, TP2, and TP3**

165 Genomic DNA of *A. baumannii* TP1, TP2, and TP3 was extracted using a bacterial genomic  
166 DNA extraction kit from Zymo Research. The extracted DNA was sequenced via  
167 Illumina TruSeq in parallel to Oxford Nanopore MinIon R9 flowcell sequencing conducted at  
168 Texas A&M Institute for Genome Sciences and Society (TIGGS) located in College Station, TX.  
169 For Illumina sequencing, libraries were prepared using TruSeq Nano kit and sequenced by  
170 Illumina MiSeq with V2 500-cycle cartridge. For Oxford Nanopore  
171 MinIon R9 flowcell sequencing, a Nanopore SQK-RAD004 Rapid Sequencing Kit was used.  
172 Using reads obtained from Illumina and Nanopore, complete genome sequences of TP1, TP2,  
173 and TP3 were determined using a combination of bioinformatic tools and conducting  
174 confirmational PCR for gap regions (see Supplementary Table S1 for PCR primers  
175 used). Illumina reads were passed through FastQ groomer (Blankenberg, Gordon et al. 2010)  
176 and trimmed using Trimmomatic (Bolger, Lohse et al. 2014) with parameter settings  
177 AVGQUAL= 25; SLIDINGWINDOW = 4, average quality required = 28; TRAILING = 25.  
178 After trimming, reads were checked for quality with FastQC  
179 ([www.bioinformatics.babraham.ac.uk/projects/fastqc](http://www.bioinformatics.babraham.ac.uk/projects/fastqc)). For TP1, Nanopore reads were trimmed,  
180 and initial assembly was performed with Unicycler to generate a scaffolding draft genome. For  
181 TP2 and TP3, trimming was not performed and Canu was used to create a *de novo*  
182 assembly using raw reads. Illumina reads were mapped onto the draft genomes with Bowtie2  
183 (Langmead, Trapnell et al. 2009, Langmead and Salzberg 2012), using fast end-to-end  
184 parameters and default settings. These mapped reads were used as input for Pilon (Walker, Abeel  
185 et al. 2014) under default settings with variant calling mode OFF. After initial sequence  
186 corrections the Illumina reads were mapped to the updated genome with Bowtie2 set to sensitive  
187 end-to-end mapping. Pilon was run again with newly mapped reads to produce the final  
188 output. All other settings remained default. All reads were then remapped against the Pilon-  
189 produced contig, and low coverage areas or areas with ambiguous base calls were confirmed by  
190 PCR (see Supplementary Table S1 for PCR primers used). The complete genome sequences  
191 were deposited to NCBI and annotated by the NCBI Prokaryotic Genome Annotation Pipeline  
192 (PGAP) (Tatusova, DiCuccio et al. 2016). The closed, circular genome sequences were re-  
193 opened upstream of *dnaA*.



194  
195 Antibiotic resistance genes (ARGs) were identified using the CARD Resistance Gene Identifier  
196 (<https://card.mcmaster.ca/>) allowing for perfect and strict hits (Alcock, Raphenya et al. 2020)  
197 under default settings. The capsule (K) locus was identified using the Kaptive web interface  
198 (Wick, Heinz et al. 2018, Wyres, Cahill et al. 2020). Prophage regions were detected using  
199 PHASTER (Arndt, Grant et al. 2016) and the boundaries verified by BLASTn against related  
200 bacterial genomes and identification of *attL* and *attR* sites as direct repeats. Through a workflow  
201 developed at the CPT (<https://cpt.tamu.edu/galaxy-pub>), the prophage regions were compared to  
202 phage and bacterial genomes available in the NCBI nt database via BLASTn (Camacho,  
203 Coulouris et al. 2009), and ProgressiveMauve (Darling, Mau et al. 2010) was used to calculate  
204 percent identities. The location and size of indels and SNPs in TP2 and TP3 in reference to TP1  
205 were determined by using ProgressiveMauve (Darling, Mau et al. 2010), followed by manual  
206 verification.  
207

### 208 **Generation of phage-resistant *A. baumannii* mutants *in vitro***

209 Phage-resistant mutants of *A. baumannii* TP1 were generated *in vitro* by spotting undiluted  
210 phage lysates (10 µl) to lawns of TP1 and picking colonies growing within the spots following  
211 overnight incubation, and streaking to fresh TSA plates. These isolates were then used to  
212 inoculate fresh TSB cultures which were grown to an OD<sub>550</sub> of 0.2 - 0.3 and infected with the  
213 same phage at an MOI of 0.2. The cultures were incubated for 6 hours at 37 °C, and then plated  
214 on TSA to produce individual colonies. A single colony was isolated from these plates and  
215 purified by an additional round of subculture. Strains were confirmed to be resistant to phage by  
216 spot assays as described above. Three independent phage-resistant mutants were isolated against  
217 phages AC4, Maestro, AB-Navy97, AbTP3phi1, and two independent mutants were isolated  
218 against phage AB-Navy1.  
219

### 220 **Genomic characterization of *in vitro* phage-resistant *A. baumannii* mutants**

221 Genomic DNA of *A. baumannii* was extracted as described above, prepared for sequencing with  
222 an Illumina TruSeq Nano kit, and sequenced by Illumina MiSeq V2 for 500 cycles. Bowtie2 (v.  
223 2.2.4) (Langmead, Trapnell et al. 2009) was used to map forward and reverse raw reads to the  
224 reference genome of the parental strain TP1 in --fast mode with maximum fragment length set to  
225 800. BAM files were analyzed in samtools mpileup v.1.2 with max per-file depth of  
226 250. Bcftools call v.1.3.0 was used to identify SNPs and indels by consensus call in haploid  
227 mode. Read mapping of the parental (TP1) reads against the reference genome was used to  
228 subtract spurious variant calls from mapped mutant reads, and remaining variant calls were  
229 filtered to retain calls with quality scores of 100 or greater.  
230

### 231 **NCBI accession numbers**

232 The genomes of *A. baumannii* TP1, TP2, and TP3 were deposited in the NCBI database under  
233 BioProject [PRJNA641163](https://ncbi.nlm.nih.gov/bioproject/PRJNA641163), with the following accession and BioSample numbers. TP1:  
234 [CP056784](https://ncbi.nlm.nih.gov/assembly/CP056784) and [SAMN15344688](https://ncbi.nlm.nih.gov/sra/SAMN15344688); TP2: [CP060011](https://ncbi.nlm.nih.gov/assembly/CP060011) and [SAMN15735522](https://ncbi.nlm.nih.gov/sra/SAMN15735522); TP3: [CP060013](https://ncbi.nlm.nih.gov/assembly/CP060013) and  
235 [SAMN15738014](https://ncbi.nlm.nih.gov/sra/SAMN15738014). Phages were deposited to NCBI under the following accession numbers:  
236 [MT949699](https://ncbi.nlm.nih.gov/assembly/MT949699) (Maestro), OL770258 (AB-Navy1), OL770259 (AB-Navy4), OL770260 (AB-  
237 Navy71), OL770261 (AB-Navy97), OL770262 (AC4), OL770263 (AbTP3Phi1).  
238  
239

## 240 Results and Discussion

241

### 242 Genomic characterization of phages used in human clinical intervention

243

244 The clinical course of the *A. baumannii* infection and phage treatment, known as the “Patterson  
245 Case”, has been described previously (Schooley, Biswas et al. 2017). Briefly, phage treatment  
246 was initiated with two phage cocktails, each containing four phages: cocktail  $\Phi$ PC was  
247 administered into abdominal abscess cavities through existing percutaneous drains, and cocktail  
248  $\Phi$ IV was administered intravenously. Near the end of patient treatment, a ninth phage,  
249 AbTP3 $\Phi$ 1, was isolated to target the phage-resistant *A. baumannii* strain TP3 that arose during  
250 treatment. Phage AbTP3 $\Phi$ 1 was administered intravenously in a two-phage cocktail ( $\phi$ IVB) in  
251 combination with one phage from cocktail  $\phi$ IV (Schooley, Biswas et al. 2017). As a follow up  
252 study to this phage intervention case, we determined the genomes of the phages and also of the  
253 bacterial strains that were isolated during phage treatment. All nine phages used in these  
254 cocktails were sequenced and their genomes are summarized in **Table 1**. Genome sequences of  
255 phages C2P12, C2P21 and C2P24 used in cocktail  $\Phi$ PC were determined to be identical, so  
256 phage C2P24 was renamed as phage Maestro and is used as a representative of this group. The  
257 phages can be categorized into two broad groups: phages Maestro, AC4, AB $\phi$ i1, AB $\phi$ i4,  
258 AB $\phi$ i71 and AB $\phi$ i97 are large (165-169 kb) T4-like myophages, and phage AbTP3 $\Phi$ 1 is a 42  
259 kb podophage.

260

261 The six myophages used are closely related, with nucleotide sequence identity ranging from  
262 64.2%-95.6% between any two genomes, as determined by progressiveMauve analysis (**Figure**  
263 **1**). Based on analysis by BLASTn, both Maestro and AB- Navy71 share 90%-96% overall  
264 sequence identity with *Acinetobacter* phage AbTZA1 (NC\_049445), which is classified as a  
265 member of the genus *Hadassavirus* by the International Committee on Taxonomy of Viruses  
266 (ICTV) (Adriaenssens, Krupovic et al. 2017); predicted taxonomic placements of the other four  
267 closely related myophages (AC4, AB- Navy1, AB- Navy4, AB- Navy97) are in the genus  
268 *Lazarusvirus* based on 92%-96% sequence identity shared between each phage with phage  
269 AM101 (NC\_049511).

270

271 The genome of Maestro is presented as an example for this group of *Acinetobacter* myophages  
272 (**Supplementary Figure 1**). Maestro has a complete genome size of 169,176 bp and a GC-  
273 content of 36.6%. Seven tRNA genes were identified, including one that appears to specify an  
274 amber codon. Genes encoding phage integrases or proteins associated with bacterial virulence  
275 were not detected. A conserved core of 95 T4-like genes were identified, clustered in several  
276 regions of the genome. These include genes encoding structural proteins and proteins involved in  
277 DNA nucleotide metabolism and replication. Proteins involved in transcriptional regulation in  
278 T4 were found to have homologs in Maestro, which suggests Maestro follows a T4-like program  
279 of gene expression, with positive control of early, middle and late transcripts (Miller, Kutter et  
280 al. 2003). Interspersed between conserved gene clusters are hypothetical ORFs with no clear  
281 associated function, mostly conserved among T4-like phages infecting *Acinetobacter* but not  
282 with T4, suggesting that these genes might be involved in host-specific phage interactions.  
283 Conserved hypothetical proteins among these T4-like phages of *Acinetobacter* represent 42% of  
284 the ORFs in the Maestro genome. The holin and endolysin lysis genes in Maestro are similarly  
285 located as in T4 and have high primary structure similarity, indicating that the first two steps in

286 lysis, the permeabilization of the inner membrane and the degradation of the cell wall are  
287 effected the same way (Cahill and Young 2019). The third step, disruption of the outer  
288 membrane, is accomplished in most dsDNA phages by spanin proteins, encoded by the *pseT.3*  
289 and *pseT.2* genes in T4. Even in large genomes like Maestro, spanin genes are detectable  
290 because every spanin complex has at least one OM lipoprotein, thus requiring a lipobox motif in  
291 the N-terminal amino acid sequence (Kongari, Rajaure et al. 2018). No suitable lipobox motifs  
292 were detected in the Maestro genome, indicating that Maestro, like some other *Acinetobacter*  
293 phages, uses a different mechanism for OM disruption (Hernandez-Morales, Lessor et al. 2018,  
294 Kongari, Rajaure et al. 2018). Homologs of the phage T4 RI and RIII antiholins were identified  
295 in the Maestro genome, indicating this phage has the ability to undergo T4-like lysis inhibition  
296 (Krieger, Kuznetsov et al. 2020). The effects of lysis inhibition in therapeutic interventions are  
297 not known, but superinfection-induced lysis inhibition delays lysis time and increases burst size  
298 *in vitro* and could affect *in vivo* phage proliferation at the site of therapeutic application.  
299  
300

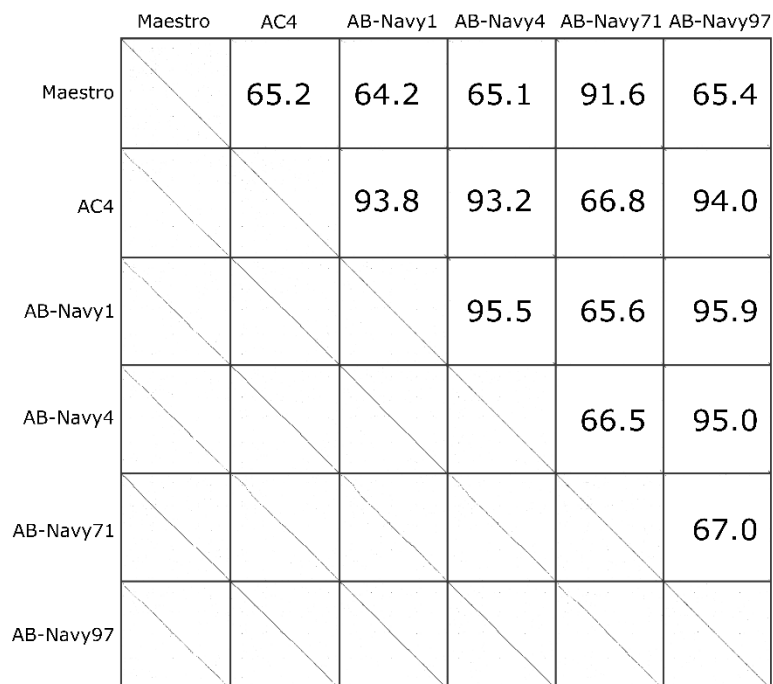

301 **Figure 1.** DNA sequence relatedness of six T4-like phages. Upper section: pairwise percent  
302 DNA sequence identities between all six phages, as determined by ProgressiveMauve. Lower  
303 section: dotplots visually representing DNA sequence homology between phages.  
304



305 During the infection process of phage T4, the long tail fibers (LTFs) bind to the phage's receptor  
306 on the cell surface. In T4, the LTF is comprised of Gp34, Gp35, Gp36 and Gp37, which form the  
307 proximal LTF, two joints, and distal LTF, respectively; the distal LTF contains the phage  
308 receptor-binding function in its C-terminal domain (Bartual, Otero et al. 2010, Hyman and van  
309 Raaij 2018). The LTFs and receptor-binding proteins of the myophages used in phage treatment  
310 were identified based on their similarity to T4 proteins. The distal domains of the myophage  
311 LTFs, containing the predicted receptor binding domains, were compared by multiple sequence  
312 alignment (**Supplementary Figure 3**) and construction of a neighbor-joining tree to determine  
313 their relationships (**Figure 2**). Multiple sequence alignment revealed the myophages used in the  
314 cocktails had two different types of tail fibers, with Maestro, AC4, Navy71 belonging to one  
315 cluster, and Navy1, Navy4, and Navy97 belong to the other cluster (**Figure 2**). This finding  
316 correlates with the phage resistance patterns observed in *A. baumannii* strains isolated from the  
317 patient before and during phage treatment (**Table 2**). Strains resistant to phage AC4 were also  
318 resistant to phage Maestro as well as to AB-Navy71, but the same strains were still partially  
319 sensitive to Navy1, Navy4, and Navy97. Six days after the start of treatment, resistance to phage  
320 AB-Navy1, AB-Navy4 and AB-Navy97 was observed simultaneously.  
321

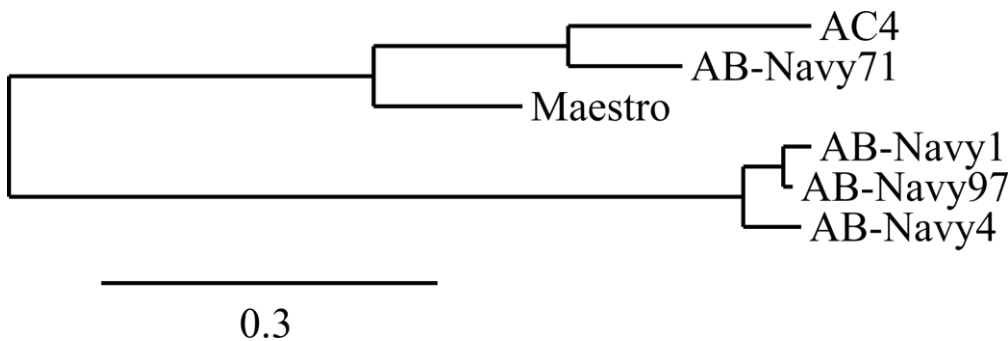

**Figure 2.** Phylogenetic tree constructed based on the long tail fiber protein sequences of the myophages used in phage treatment.

322 The podophage AbTP3Φ1 was not available until near the end of treatment, but this phage is  
323 genetically distinct from the myophages and appears to use a different receptor, as *A. baumannii*  
324 isolates that are resistant to the myophages appear to retain at least partial sensitivity to this  
325 phage. Compared to the myophages described above, the much smaller 42 kb podophage  
326 AbTP3Φ1 is classified as a member of the genus *Friunavirus* of the *Autographivirinae* family by  
327 ICTV (Adriaenssens, Krupovic et al. 2017) (**Table 1**). The genome map of AbTP3Φ1 is shown  
328 in **Supplementary Figure 2**. It shares at 82-89% overall DNA identity, as well as genome  
329 synteny, to a group of previously described *Acinetobacter* phages, including IME200  
330 (NC\_028987), vB\_AbaP\_AS11 (NC\_041915), Fri1 (KR149290) (Popova, Lavysh et al. 2017)  
331 and Pipo (MW366783). As a conserved feature of this group of phages, a terminal repeat region  
332 of 396 bp was identified in AbTP3Φ1 genome by the PhageTerm tool (Garneau, Depardieu et al.  
333 2017). The tail spike protein of AbTP3Φ1 shares  $\geq 95\%$  identity to those found in this group of

334 phages based on BLASTp alignment, and HHpred searches indicate its tailspike matches the  
335 phiAB6 tail spike (5JSD, 99.93%), indicating that AbTP3Φ1 adsorption is associated with  
336 exopolysaccharide degradation (Lee, Tu et al. 2017). Similar to the myophages reported in this  
337 study, spanin proteins were not found in the genome of AbTP3Φ1 nor in any other *A. baumannii*  
338 podophage genomes (Hernandez-Morales, Lessor et al. 2018). Recently, another type of OM  
339 disruption protein, the disruptin, was identified in coliphage phiKT (Holt, Cahill et al. 2021).  
340 However, no proteins with sequence similarity to the phiKT disruptin is detectable in the  
341 genomes of any of these cocktail phages. It is possible that entirely novel OM disruption  
342 proteins are encoded in these cocktail phages (Hernandez-Morales, Lessor et al. 2018).

343  
344 These phage sequencing results highlight the importance of thorough genomic analysis of phages  
345 prior to phage treatment in order to maximize treatment success and minimize effort and  
346 consumption of resources. While none of the phages used contain any detectable deleterious  
347 genes and appear to be strictly virulent, three of the phages used in cocktail ΦPC were found to  
348 be genetically identical. Due to the time constraints imposed by the emergency nature of the  
349 clinical intervention, phages C2P12, C2P21 and C2P24 were isolated from environmental  
350 samples mere days before their production and administration to the patient, which did not allow  
351 for extensive characterization. The other phages used in the initial ΦPC and ΦIV cocktails,  
352 while not identical, are closely related and fall into only two groups based on tail fiber similarity.  
353 This explains why *A. baumannii* isolates collected as soon as two days after the start of phage  
354 treatment were either completely insensitive or markedly less sensitive to all of the myophages  
355 used in the initial two cocktails. The initial treatment in this case could have been conducted by a  
356 cocktail of only two of the myophages, or perhaps even a single myophage, and plausibly  
357 produced a similar outcome. It is difficult to speculate on the role of AbTP3Φ1 in the treatment  
358 outcome, as this phage was not introduced until the end of treatment after the patient had already  
359 made considerable progress towards recovery. However, if AbTP3Φ1 had been available at the  
360 start of treatment, a rational design in the phage cocktail would indicate its inclusion due to its  
361 lack of relationship to the other phages and apparent use of a genetically independent receptor.  
362 Ideal phage cocktails should not only contain phages possessing an exclusively lytic life cycle  
363 and be free of deleterious genes, but should also exhibit genetically independent mechanisms of  
364 host resistance. Ideally this would be manifest in the use of different receptors, which may be  
365 revealed by thorough characterization before their use as therapeutics.

### 366 367 **Phage and antibiotic sensitivity of *A. baumannii* strains isolated during treatment**

368  
369 During phage treatment, *A. baumannii* isolates were collected from the patient via various drains  
370 or bronchial washes. These strains were tested for their phage sensitivity via plaque assays.  
371 These showed that as early as 2 days after phage administration, the efficiency of all the phages  
372 in the first two cocktails (ΦPC and ΦIV) was reduced when tested against the bacterial strains  
373 isolated during treatment, evident by the decreased titers on those strains compared to the initial  
374 titers observed with TP1 (**Table 2**). In some cases, only a zone of clearing (but no individual  
375 plaques) was observed on the plates at high phage concentrations. Consistent with the myophage  
376 tail fiber protein sequence alignment (**Figure 2**), host resistance to phages appeared earlier with  
377 Maestro, AC4, and Navy71 as a group, and later with phages Navy1, Navy4, and Navy97 as a  
378 group. In comparison, resistance to phage AbTP3Φ01 was not observed in bacterial isolates  
379 collected throughout two months of phage treatment, although plating efficiencies of AbTP3Φ01

380 varied by up to three orders of magnitude on strains collected during treatment (**Table 2**). The  
381 emergence of phage resistance early in phage treatment again illustrates the potential benefits of  
382 well-characterized and rationally designed phage cocktails in treatment, which could be designed  
383 to mitigate the emergence of resistance. It also raises questions on the benefits of continued  
384 phage treatment beyond the first ~9 days, since all isolates collected after this time are fully  
385 resistant to the phage. While it is possible that the prolonged period of phage administration  
386 (over 60 days) was not required to produce the observed clinical outcome, other studies have  
387 shown that phage-insensitive mutants of *A. baumannii* exhibit reduced virulence (Regeimbal,  
388 Jacobs et al. 2016). Thus, maintaining selection pressure for the phage-resistant phenotype may  
389 provide a benefit to continued treatment even after the pathogen has developed phage resistance.

390  
391 Some strains isolated throughout phage treatment were also tested for their antibiotic resistance  
392 profiles by traditional microtiter MIC (**Supplementary Table S2**). In general, the antibiotic  
393 resistance profiles of all strains isolated during the course of phage therapy remained consistent,  
394 indicating that phage therapy did not have a major impact on antibiotic resistance of the  
395 pathogen. Although an initial report indicated resistance to colistin and tigecycline prior to the  
396 start of phage therapy (Schooley, Biswas et al. 2017), sensitivity to colistin and tigecycline (in  
397 the range of 2-8 ug/ml) was observed in strains isolated ~7 weeks after the start of phage therapy  
398 (collected on May 9, 2016). While sensitive to colistin and tigecycline, these strains were  
399 resistant to minocycline. We previously reported on a potential synergistic *in vitro* activity  
400 between phage cocktail and minocycline (used at sub-inhibitory concentrations of 0.25 ug/ml) in  
401 inhibiting bacterial growth (Schooley, Biswas et al. 2017). However, such results were obtained  
402 using strain TP3, and TP3 was not tested for its sensitivity to minocycline, colistin, or tigecycline  
403 in these MIC assays. The effect of phages on the antibiotic resistance of *A. baumannii* warrants  
404 further study.

405  
406 To more fully delineate the phenotypic differences between TP1 and TP3, BioLog  
407 phenotypic microarray profiling was conducted using phenotypic microarrays (PM) 1-20 (**Figure**  
408 **3, Supplementary Table S3**). As expected given the clonal nature of the isolates, the phenotypic  
409 microarrays demonstrated very consistent phenotypes in terms of carbon, nitrogen, phosphorus  
410 and sulfur utilization; biosynthetic pathways and nutrient stimulation; osmotic/ionic response;  
411 and pH response; as well as very consistent phenotypes in the chemical sensitivity assays  
412 (**Figure 3**). The phenotypic profiling results show that growth of both isolates TP1 and TP3  
413 could be inhibited by colistin or minocycline at higher concentrations (**Figure 3**, yellow box and  
414 light blue box, respectively); tigecycline sensitivity is not included in the phenotype microarray  
415 panel. Isolate TP3 was found to be completely resistant to nafcillin in this assay, whereas TP1  
416 was sensitive (**Figure 3**, purple box).

417  
418

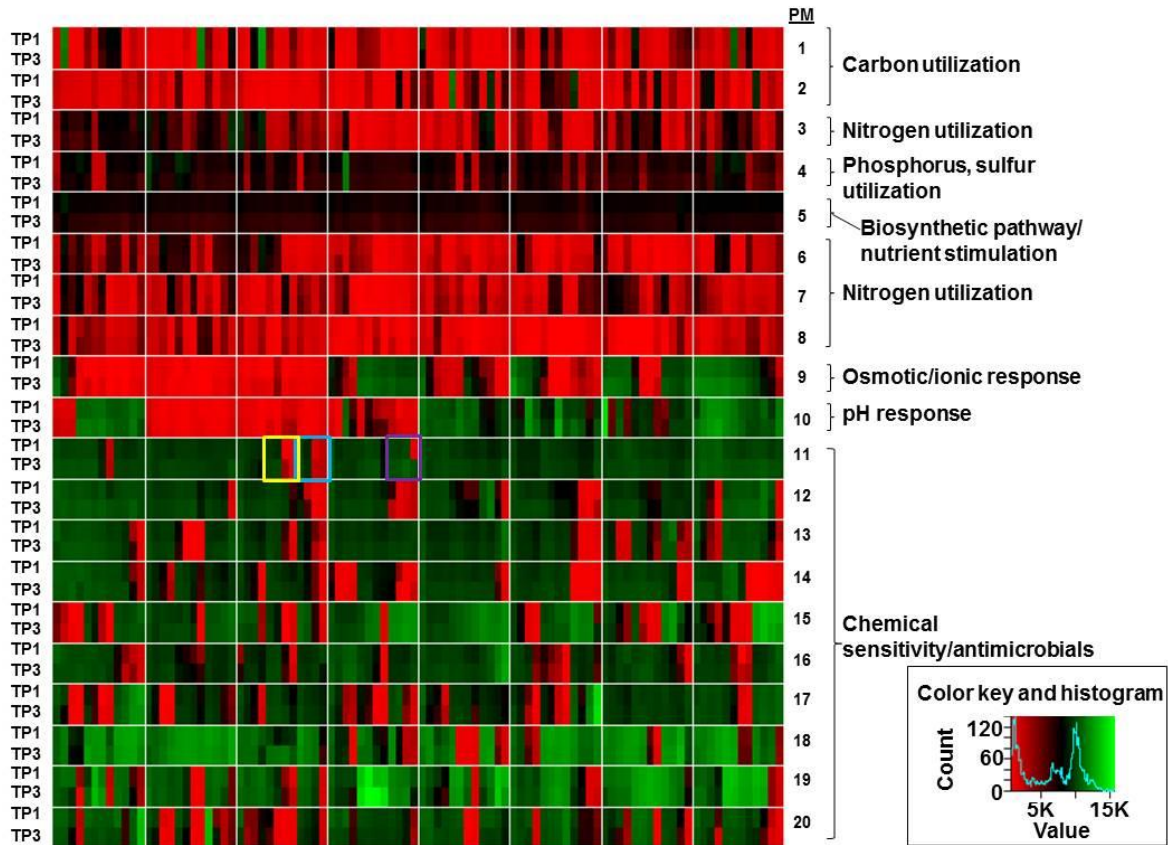

419  
420

421

422 **Figure 3.** Phenotypic profiling of strains TP1 and TP3. Yellow box: colistin. Light blue box:  
423 minocycline. Purple box: nafcillin. Results are calculated using the using area under the curve for  
424 48 hours of growth and are represented are the average of three replicates per strain.

425

426

427

### 428 **Characterization of *A. baumannii* strains TP1, TP2, and TP3 isolated before and during** 429 **phage therapy**

430

431 Three *A. baumannii* isolates, TP1, TP2, and TP3, were sequenced to closure using a combination  
432 of short-read (Illumina) and long-read (Nanopore) sequencing to investigate pathogen evolution  
433 during the course of phage treatment. Sequencing to closure allows for comparison of not only  
434 SNPs and indels during bacterial evolution but also for tracking of the number and position of  
435 mobile DNA elements that are often not assembled into larger contigs if the genomes are only  
436 sequenced to a draft state with short-read sequencing. Strain TP1 was isolated prior to the start  
437 of phage treatment and was the clinical isolate used to determine phage sensitivity and conduct  
438 environmental phage hunts for assembly of therapeutic phage cocktails (Schooley, Biswas et al.  
439 2017). Strains TP2 and TP3 were isolated 6 days and 8 days after the start of phage treatment.  
440 All three strains were found to contain a single 3.9 Mb chromosome and a single 8.7 kb plasmid  
441 (**Table 3**). Some variation was observed in bacterial chromosome length between strains but the  
442 plasmids contained in each strain were identical, and it is clear that these three isolates represent

443 the evolution of strains from a common ancestor over time rather than a succession invasion by  
444 different strains. Analysis of the genomes in pubMLST (Jolley, Bray et al. 2018) identified all  
445 three isolates as sequence type 570 (Pasteur) and analysis in Kaptive (Wick, Heinz et al. 2018)  
446 identified a 20.5 kb region (base position 3,774,031 - 3,794,556 in the TP1 genome) containing  
447 17 genes encoding a predicted capsule type of KL116 (**Supplementary Table S4**) (**Figure 5A**).  
448 Consistent with the broad antibiotic resistance observed in these isolates, 32 (TP1) and 35 (TP2,  
449 TP3) antibiotic resistance genes were identified based on searches against the CARD 2021  
450 database (Alcock, Raphenya et al. 2020) (**Supplementary Table S5**). The 8.7 kb plasmid  
451 contained in TP1, TP2 and TP3 does not encode any identifiable AMR genes, and is identical to  
452 plasmids carried in many other *A. baumannii* strains deposited in NCBI. Less than 200 SNPs  
453 and indels were observed between these isolates, including 2-3 large (> 1 kb) insertions or  
454 deletions associated with the movement of mobile DNA elements. Summaries of the genomes  
455 and changes observed in strains TP2 and TP3 (relative to TP1) are summarized in **Table 3**, and  
456 the locations of AMR genes, transposases, prophages, capsule locus in TP1 genome, and large  
457 insertion and deletions (>1 kb) in TP2 and TP3, in reference to TP1, are illustrated in **Figure**  
458 **4**. In reference to TP1, detailed sequence changes, associated coordinates and genes affected in  
459 TP2 and TP3 are listed in **Supplementary Tables S6 and S7**, respectively.  
460  
461



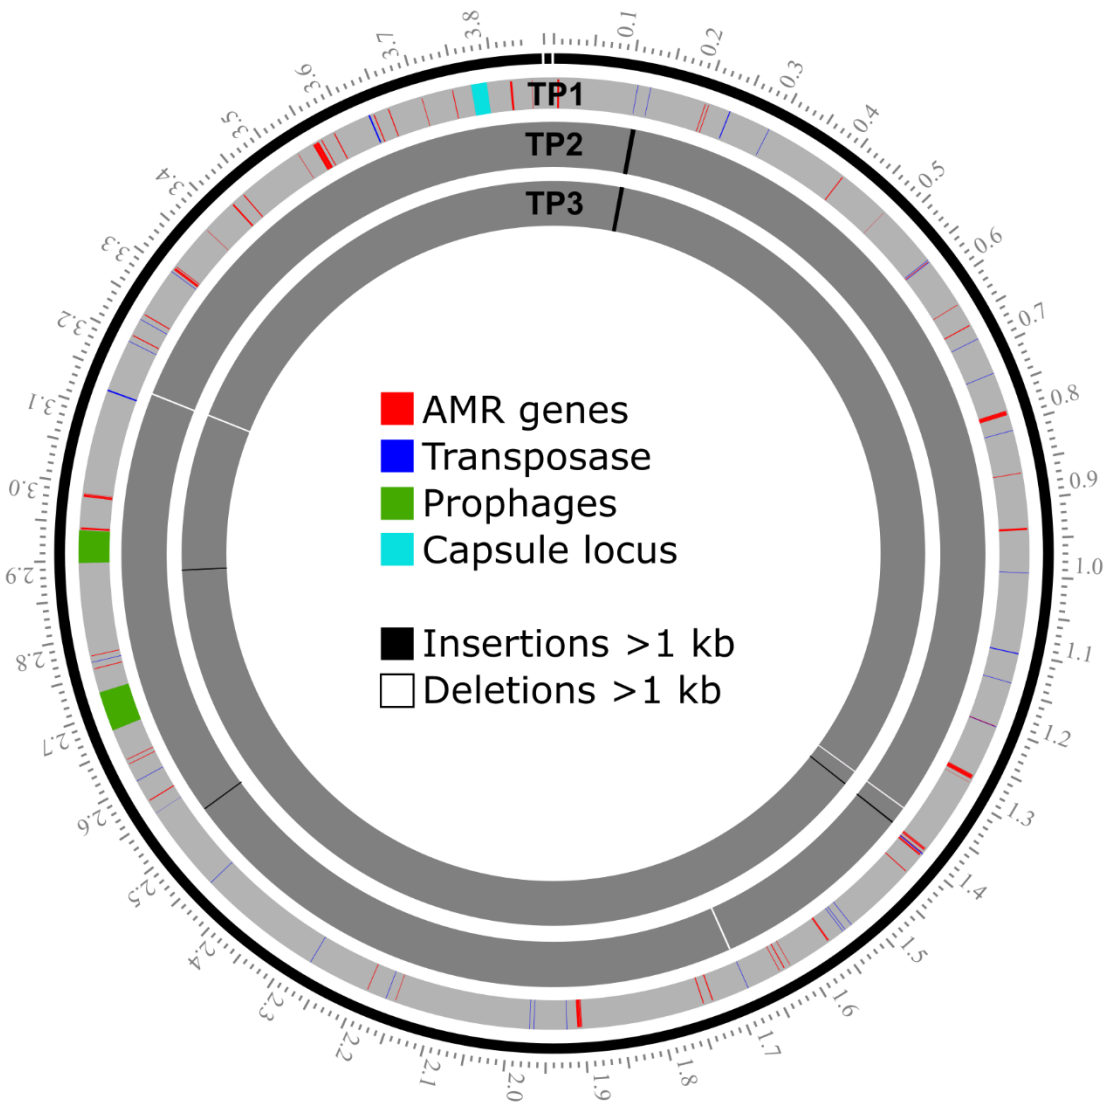

462

463 **Figure 4.** Locations of AMR genes, transposases, prophages, capsule locus in TP1 genome, and  
464 large insertion and deletions (>1 kb) in TP2 and TP3, in reference to TP1.

465

## 466 **Notable large insertions and deletions in TP2 and TP3 compared to TP1**

467  
468 One of the notable changes in TP2 and TP3 is a novel 6,673 bp insertion sequence that is not  
469 present in TP1. This element is inserted in a position adjacent to an existing IS3-like transposase  
470 at position 111,357 of the TP1 genome (**Figure 4**) (**Supplementary Tables S6, S7**). This  
471 insertion introduces a second copy of the same gene such that the new sequence is flanked by  
472 identical copies of the transposase, in addition to carrying its own IS30-like transposase. This  
473 acquired 6.7 kb element is not native to TP1 and represents an acquisition of new DNA by  
474 horizontal gene transfer that occurred during the course of infection, and is most likely the result  
475 of DNA acquisition mechanisms unrelated to phage treatment. *A. baumannii* is known for its  
476 ability to rapidly acquire mobile DNA elements in the environment via conjugation and natural  
477 competence (Wilharm, Piesker et al. 2013, Domingues, Rosario et al. 2019), and to vary surface  
478 molecules through horizontal gene transfer (Snitkin, Zelazny et al. 2011). T4-like phages like  
479 those used in treatment are generally poor transducers. In phage T4, multiple defects in *ndd*,  
480 *denB*, *42* and *alc* are required for transduction to occur (Young, Edlin et al. 1982), and these  
481 genes are all conserved in the cocktail myophages reported in this study. In addition,  
482 transduction requires the phage to be able to productively infect the donor of the acquired DNA,  
483 which was likely to have been a different bacterial species and thus insensitive to the phages  
484 used.

485  
486 BLASTn searches of this sequence identified identical or nearly identical sequences in other  
487 Gram-negative bacterial genomes or plasmids, including *A. baumannii* (CP038644), *Klebsiella*  
488 *pneumoniae* (LR697132), *E. coli* (CP020524), and *Citrobacter freundii* (KP770032). This  
489 inserted sequence encodes a number of significant additional antibiotic resistance determinants,  
490 including a predicted aminoglycoside O-phosphotransferase (IPR002575), an NDM-1-like  
491 metallo-beta-lactamase (CD16300, IPR001279), and a CutA-like protein that may be involved in  
492 metal tolerance (IPR004323). The inserted aminoglycoside O-phosphotransferase (CARD  
493 ARO:3003687) is relatively rare in *A. baumannii*, found in 1.43% of *A. baumannii* chromosomes  
494 and 0.47% of *A. baumannii* plasmids, as reported by the CARD Resistance Gene Identifier. The  
495 prevalence of the inserted NDM-1-like metallo-beta-lactamase (CARD ARO:3000589) is 5.94%  
496 of *A. baumannii* genomes and 0.6% of *A. baumannii* plasmids.

497  
498 Other than the 6.7 kb insertion described above, all other major variations in the TP2 and TP3  
499 genomes can be attributed to recombination, deletion or transposition of elements present in the  
500 TP1 genome. Another 1,886 bp insertion sequence was identified in TP2 and TP3, inserted at  
501 position 1,381,905 of the TP1 genome, adjacent to an existing IS6-like IS26 family transposase  
502 (**Figure 4**) (**Supplementary Tables S6, S7**). This insertion introduces a second copy of the IS6-  
503 like transposase and an additional copy of an aminoglycoside O-phosphotransferase  
504 (IPR002575) which is also present in TP1 (locus HWQ22\_16890) and flanked by copies of the  
505 same IS6-like transposase. In this case, this insertion is a duplication of an existing AMR gene  
506 rather than the acquisition of foreign DNA. The presence of the new 6.7 kb element and the  
507 duplicated 1.9 kb element resulted in 3 extra antibiotic resistance genes in TP2 and TP3 (35 total  
508 predicted AMR genes) compared to TP1 (32 total predicted AMR genes) (**Table 3**;  
509 **Supplementary Table S5**).

510  
511

512 Strain TP1 contains a 1,094 bp IS30 family transposase present at position 3,143,593 of the  
513 chromosome, which is not present in TP2 or TP3. This transposase interrupts a restriction  
514 endonuclease-like protein in TP1 which is complete in TP2 and TP3. Based on BLASTn  
515 analysis of this region, it appears that the intact state seen in TP2 and TP3 is ancestral, as this  
516 version of this region appears in 165 other *Acinetobacter* genomes, while the IS-interrupted  
517 version of this region is unique to TP1. This indicates that TP2 and TP3 are not directly  
518 descended from TP1. However, TP2 and TP3 do appear to share a common ancestor as they  
519 both contain the novel 6.7 kb insertion element, but TP3 is not a clear descendant of TP2 as there  
520 are multiple genetic changes in TP2 that are absent in TP3, such as a ~1 kb deletion at the ~1.7  
521 Mb position in TP2 that is not present in TP1 or TP3 (**Figure 4, Supplementary Table S8**). The  
522 *A. baumannii* strain was clearly evolving and radiating multiple lineages during the course of  
523 infection and treatment. This highlights the fact that bacterial pathogens are undergoing constant  
524 selective pressure *in vivo* and do not exist as strictly clonal populations even in a single patient  
525 over time.

526

### 527 **Prophage elements in TP1, TP2, and TP3**

528

529 Prophage analysis revealed two apparently complete prophage regions (52,561 bp and 42,762 bp  
530 in length, respectively) in TP1, TP2, and TP3 genomes that are likely to encode active prophages  
531 (**Figure 4**). Phage *att* sites and conserved phage proteins (tail and tail tape measure protein,  
532 major head subunit and head morphogenesis protein, terminase large subunit, endolysin) were  
533 identified in both prophage regions. These two prophage regions are conserved in TP1, TP2, and  
534 TP3 and no sequence change was observed among the three strains. The 52 kb prophage is  
535 highly conserved (with up to 100% nucleotide identity by BLASTn) in many other *A. baumannii*  
536 genomes, including that of ATCC 19606, which is one of the earliest available clinical isolates of  
537 *A. baumannii*, dating to the 1940's (Hamidian, Blasco et al. 2020). This prophage region shares  
538 limited similarity to cultured phages, with its closest relative being *Acinetobacter* phage Ab105-  
539 3phi (KT588073), with which it shares 49.4% nucleotide identity and 22 similar proteins. The  
540 43 kb prophage region was found to be less conserved in other *A. baumannii* genomes, with the  
541 most closely related prophage element sharing only 69% overall sequence identity. This  
542 prophage region is ~46% related to *A. baumannii* phage 5W (MT349887), which also appears to  
543 be a temperate phage due to the presence of an integrase and LexA-like repressor. Other than  
544 5W, this element is not closely related to any other cultured phages in the NCBI database,  
545 sharing no more than 10% nucleotide identity and no more than 8 proteins with other phages.

546

### 547 **Characterization of phage-resistant mutants generated *in vitro* and the comparison to *in vivo* isolates**

548

549  
550 Five phages selected from the phage cocktails (AC4, Maestro, AB-Navy1, AB-Navy97,  
551 AbTP3phi1) were used to select for phage-insensitive mutants *in vitro* using *A. baumannii* strain  
552 TP1 as host. Three independent mutants against phages AC4, Maestro, AB-Navy97, AbTP3phi1  
553 were isolated, and two independent mutants against phage AB-Navy1 were isolated. After  
554 resequencing and mapping mutant reads to the reference TP1 genome, changes detected with  
555 quality scores greater than 100 were examined (**Table 4**). The majority of identified mutations  
556 were located in the bacterial KL116 capsule locus. The KL116 capsule is comprised of a five-  
557 sugar repeating unit with a three-sugar backbone composed of Gal and GalNAc and a two-sugar

558 side chain composed of Glc and GalNAc (Shashkov, Cahill et al. 2019). In all the mutants  
559 resistant to the myophages Maestro, AC4, AB-Navy97, a common 6-bp deletion was observed in  
560 a predicted capsular glycosyltransferase protein identified as Gtr76 by Kaptive (HWQ22\_04225)  
561 (**Figure 5A**). Notably, these 6-bp deletions were also observed in isolates TP2 and TP3, which  
562 evolved *in vivo* during phage treatment and were insensitive or showed reduced sensitivity to all  
563 myophages tested (Table 2, Supplementary Table S5 and S6). These 6-bp deletions occurred in  
564 a region containing four copies of a tandem repeat sequence TAAATT (**Figure 5B**), which  
565 probably is prone to mutation by strand slippage events during replication. These mutations  
566 result in the deletion of residue L243 and N244, resulting in the loss of a predicted flexible linker  
567 between two  $\alpha$ -helices in the C-terminus of the glycosyltransferase protein. This protein is  
568 predicted to participate in capsule synthesis by forming the  $\beta$ -D-GalNAc-(1  $\rightarrow$  4)-D-Gal linkage  
569 of the side-chain disaccharide to the trisaccharide backbone (Shashkov, Cahill et al. 2019). Loss  
570 of or altered activity in this enzyme would be expected to result in capsule with reduced or  
571 absent disaccharide side-chains, suggesting that this side chain plays a major role in host  
572 recognition by these phages.

573  
574 In mutants selected for insensitivity to phage AB-Navy1, one mutant contained the same  
575 conserved 6 bp deletion identified in the other mutants, and one lacked this mutation but instead  
576 had a nonsense mutation (W183am) in *carO* (HWQ22\_09280) (**Table 4**). CarO is a 29 kDa  
577 outer membrane transporter, loss of which has been associated with increased antibiotic  
578 resistance (Mussi, Limansky et al. 2005, Uppalapati, Sett et al. 2020). The role of CarO in phage  
579 sensitivity is not clear, but its truncation may lead to other cell wall defects that reduce  
580 sensitivity to this phage; truncations in CarO have been associated with reduced adherence and  
581 invasion in tissue culture and with reduced virulence *in vivo* (Labrador-Herrera, Perez-Pulido et  
582 al. 2020). This finding illustrates that defects in the capsule locus are not the only means by  
583 which TP1 may gain phage insensitivity. Notably, similar CarO defects were not observed in  
584 TP2 or TP3, which attained phage resistance *in vivo*.

585  
586 In addition to the common 6 bp deletion in the Gtr76 glycosyltransferase and CarO mutation, the  
587 other mutations observed in the myophage-insensitive mutants are SNPs or small indels in non-  
588 coding regions or that result in missense or silent mutations in a predicted capsular glucose-6-  
589 phosphate isomerase Gpi (HWQ22\_04190) and an ABC transporter, respectively (**Table 4**).  
590 However, these SNPs are not conserved in the *in vitro* mutants against myophages and were also  
591 not detected in *in vivo* isolates TP2 and TP3, indicating that the defect observed in the Gtr76  
592 glycosyltransferase is sufficient to confer insensitivity to the cocktail myophages in this strain.

593  
594 Strain TP1 mutants resistant to the podophage AbTP3phi1 were also found to contain mutations  
595 in the capsule locus, but these mutations were confined to the genes encoding the glucose-6-  
596 phosphate isomerase Gpi and polysaccharide biosynthesis tyrosine autokinase Wzc  
597 (HWQ22\_04255) (**Table 4, Figure 5A**). Loss of function in these genes is expected to result in  
598 loss of L-fructose-6-phosphate required for downstream production of capsule monomers and  
599 defects in capsule export, respectively (Wyres, Cahill et al. 2020). This suggests that these  
600 mutants may exhibit more severe defects in K116 capsule expression, and that AbTP3phi1  
601 requires the presence of the capsule backbone for successful infection.

602

603 Our results are consistent with the recently published work by Altamirano *et al.*, where a  
604 frameshift in the glycosyltransferase and glucose-6-phosphate isomerase within the K locus were  
605 detected in two independent phage-resistant *A. baumannii* mutants, respectively (Gordillo  
606 Altamirano, Forsyth et al. 2021). The consistency between our work and that study confirms the  
607 *A. baumannii* capsule locus being important for phage sensitivity. Both Gpi and  
608 glycosyltransferases are involved the biosynthesis of capsule K units, which are tightly packed  
609 repeating subunits consisting of 4 to 6 sugars (Singh, Adams et al. 2018). The reason why one  
610 group of phages (our myophages, and the myophage  $\Phi$ FG02 in Altamirano *et al.*) selected  
611 primarily for defects in the Gtr glycosyltransferase but the other phages (our podophage  
612 AbTP3phi1 and myophage  $\Phi$ CO01 in Altamirano *et al.*) selected for defects in Gpi is not entirely  
613 clear. These phages likely recognize different moieties of the bacterial capsule as their receptors,  
614 but it should be noted that many of the mutations associated with insensitivity observed in our  
615 study are not necessarily inactivating to the protein: the most common mutation in the capsule  
616 locus is a two-residue in-frame deletion in *gtr76* (Figure 4B), and the other mutations are single-  
617 residue changes or nonsense/frameshift mutations relatively late in the reading frame. These  
618 mutations may modulate protein function rather than being completely inactivating.

619  
620 Capsule is a known common requirement for *A. baumannii* phages, and defects in capsule  
621 synthesis have been shown to be responsible for phage resistance (Billing 1960, Gordillo  
622 Altamirano, Forsyth et al. 2021). The presence of the same 6 bp deletion in the capsular  
623 glycosyltransferase gene *gtr76* of both the *in vitro*- and the *in vivo*-selected *A. baumannii* strains  
624 indicates that the same route to phage insensitivity may be followed by strain TP1 in both  
625 systems. Importantly, this demonstrates that laboratory *in vitro* investigations of bacterial  
626 selection and phage insensitivity can produce results that are relevant and predictive for the *in*  
627 *vivo* milieu of clinical treatment. However, as can be seen by comparing **Table 3** and **Table 4**,  
628 the *in vivo*-selected strains TP2 and TP3 contain numerous genetic changes in addition to those  
629 obtained by simple selection *in vitro*. Strains TP2 and TP3, which were recovered from the  
630 patient during the course of treatment, evolved in response to nearly continuous antibiotic  
631 treatment, to the host immune response to the infection, and to the phage treatment. Thus, many  
632 of the genetic changes observed in TP2 and TP3 are likely to be adaptations to these additional  
633 stresses, or to compensate for defects in capsule expression in order to survive in this hostile  
634 environment.



635  
636

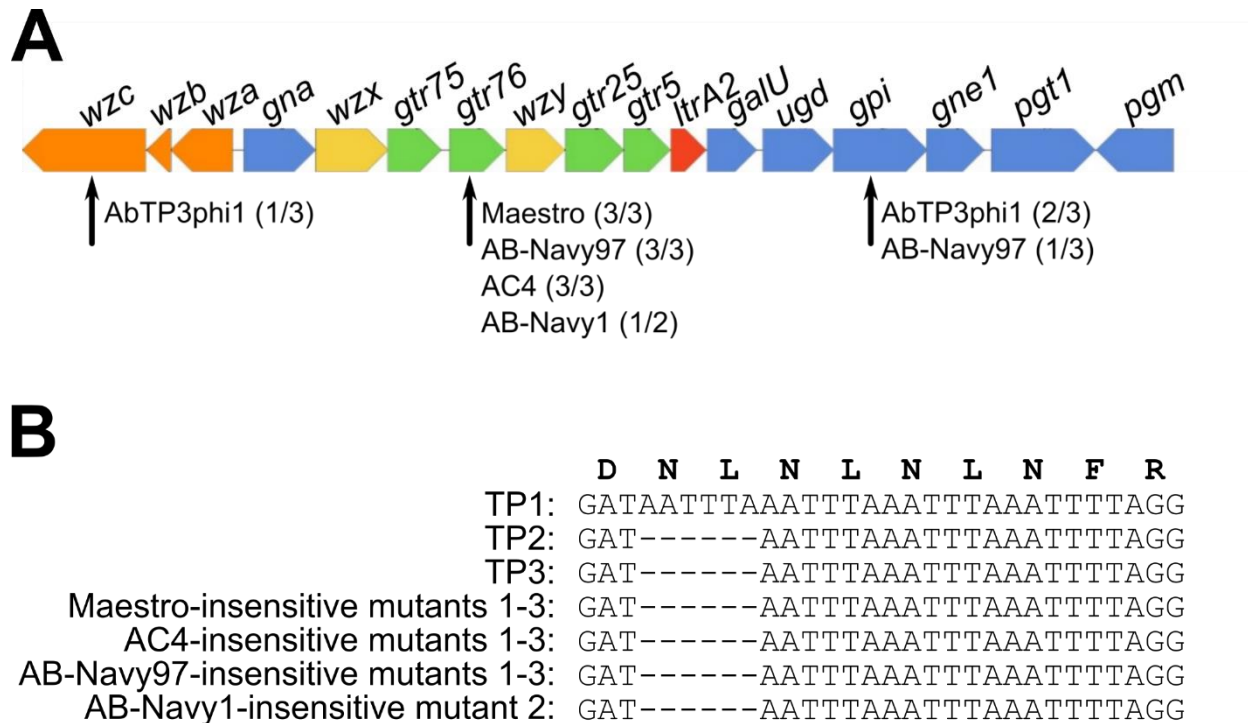

637

638 **Figure 5.** Comparison of the K loci of strains TP1, TP2 and TP3, and phage resistant mutants  
 639 generated *in vitro*. (A) Nucleotide alignment of the sequences showing the 6 nucleotide deletion  
 640 in one of the glycosyltransferases (*gtr76*) found in multiple TP1 mutants resistant to the cocktail  
 641 myophages. (B) Diagram of the KL116 capsule locus identified in strains TP1, TP2, and TP3 as  
 642 predicted by Kaptive. Genes are represented by arrows oriented in the direction of transcription.  
 643 Orange arrows represent genes involved in capsule export, yellow genes are involved in repeat  
 644 unit processing, blue genes are involved in simple sugar biosynthesis, green genes encode  
 645 glycotransferases and the red gene codes for the initiating transferase. All genes had 100%  
 646 coverage and ranged from 90% - 100% identity to the KL116 type in the Kaptive database.  
 647 Defective capsule locus genes identified in *in vitro*-generated phage-insensitive mutants of TP1  
 648 are indicated by black arrows; numbers in parentheses after each phage name indicate what  
 649 proportion of phage-insensitive mutants contained a mutation in that gene.

650  
651  
652  
653

654 **Conclusions**

655

656 In conclusion, this study provides detailed genomic information on the evolution of *A.*  
657 *baumannii* during the course of infection, showing that resistance to the therapeutic phages  
658 emerged early, and the acquisition of new mobile elements can occur during treatment. The  
659 potential for early emergence of phage resistance should be taken into account when considering  
660 the phages to be used for treatment and the optimal duration of the therapeutic regimen. Genomic  
661 analysis of the phages used in this intervention illustrates the importance of whole genome  
662 sequencing of phages to be used in phage therapy, in addition to the conventional experimental  
663 tests for phage host range and growth characteristics. In addition to assessing phage virulence  
664 and identifying carriage of potentially deleterious genes, genomic analysis of phage tail fiber  
665 proteins is of value in order to select phages utilizing different host recognition mechanisms with  
666 a goal of minimizing the development of host resistance, especially considering host receptor  
667 identification is a time-consuming experimental process. The use of genetically distinct phages  
668 in a phage cocktail can avoid redundancy and significantly save time and effort in phage  
669 production and purification, which is also an important consideration in making phage therapy  
670 practical. Finally, this work shows that relatively simple *in vitro* selections for host resistance  
671 can yield predictive results for how the organism may behave *in vivo* during infection.

672

673

674 **Acknowledgements**

675

676 The authors would like to thank Drs. Thomas Patterson, Steffanie Strathdee, Sharon Reed at  
677 UCSD for their support during this study, Dr. Andrew Hillhouse at Texas A&M Institute for  
678 Genome Sciences and Society (TIGSS) for sequencing support. This work was supported by  
679 funding from Texas A&M University, Texas AgriLife Research, the National Science  
680 Foundation (awards DBI-1565146), and Navy Work Unit Number (WUN) A1417.

681

682 Disclaimer: The views expressed in this article are those of the author and do not necessarily  
683 reflect the official policy or position of the Department of the Navy, Department of Defense,  
684 Department of Veterans Affairs, nor the U.S. Government. The authors Theron Hamilton,  
685 Kimberly Bishop-Lilly, and Biswajit Biswas are employees of the U.S. Government, US  
686 Government contractor or military service members. This work was prepared as part of official  
687 duties. Title 17 U.S.C. §105 provides that “Copyright protection under this title is not available  
688 for any work of the United States Government.” Title 17 U.S.C. §101 defines a U.S. Government  
689 work as a work prepared by a military service member or employee of the U.S. Government as  
690 part of that person’s official duties.

691

692

693  
694

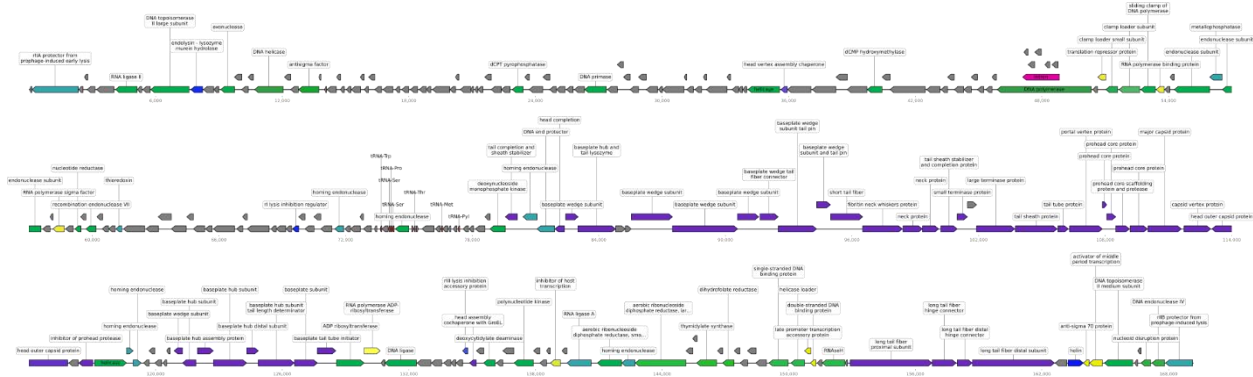

695  
696  
697  
698  
699  
700  
701  
702  
703  
704

**Supplementary Figure 1.** Genomic map of phage Maestro. Predicted genes are represented by blocks. Blocks pointing to the right are genes encoded on the forward strand, pointing to the left are on the reverse strand. The ruler below the genomes indicates scale in bp. Genes are color coded based on functions: regulatory (yellow), DNA replication (green), structural (purple), lysis (blue), intron (pink), tRNA (red), other (turquoise), hypothetical protein with unknown function (grey).

705  
706

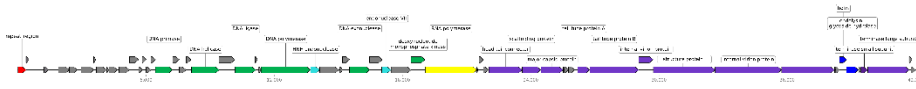

707

708 **Supplementary Figure 2.** Genome map of AbTP3Phi1. Predicted genes are represented by  
709 blocks. Blocks pointing to the right are genes encoded on the forward strand, pointing to the left  
710 are on the reverse strand. The ruler below the genomes indicates scale in bp. Genes are color  
711 coded based on functions: regulatory (yellow), DNA replication (green), structural (purple), lysis  
712 (blue), terminal repeat (red), other (turquoise), hypothetical protein with unknown function  
713 (grey).

714  
715  
716

717  
718  
719  
720

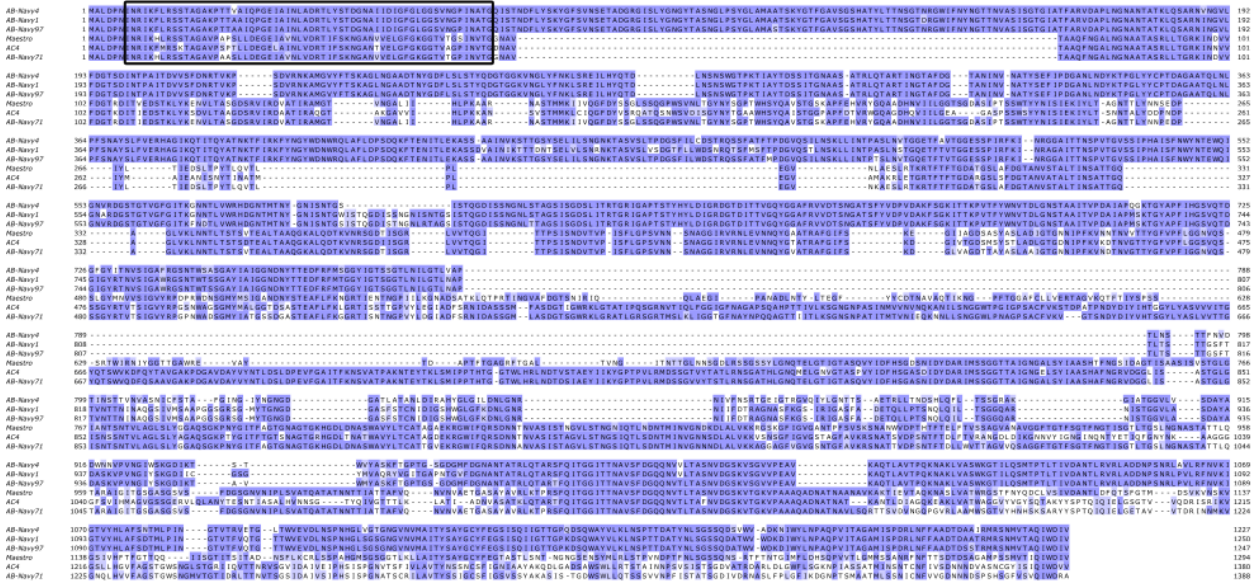

721  
722  
723  
724  
725  
726  
727



## 728 **References**

- 729
- 730 Adams, M. K. (1959). Bacteriophages. New York, Interscience Publishers, Inc.
- 731 Adriaenssens, E. M., M. Krupovic, P. Knezevic, H. W. Ackermann, J. Barylski, J. R. Brister, M.
- 732 R. Clokie, S. Duffy, B. E. Dutilh, R. A. Edwards, F. Enault, H. B. Jang, J. Klumpp, A. M.
- 733 Kropinski, R. Lavigne, M. M. Poranen, D. Prangishvili, J. Rumnieks, M. B. Sullivan, J.
- 734 Wittmann, H. M. Oksanen, A. Gillis and J. H. Kuhn (2017). "Taxonomy of prokaryotic viruses:
- 735 2016 update from the ICTV bacterial and archaeal viruses subcommittee." Arch Virol **162**(4):
- 736 1153-1157.
- 737 Afgan, E., D. Baker, B. Batut, M. van den Beek, D. Bouvier, M. Cech, J. Chilton, D. Clements,
- 738 N. Coraor, B. A. Gruning, A. Guerler, J. Hillman-Jackson, S. Hiltemann, V. Jalili, H. Rasche, N.
- 739 Soranzo, J. Goecks, J. Taylor, A. Nekrutenko and D. Blankenberg (2018). "The Galaxy platform
- 740 for accessible, reproducible and collaborative biomedical analyses: 2018 update." Nucleic Acids
- 741 Res **46**(W1): W537-W544.
- 742 Alcock, B. P., A. R. Raphenya, T. T. Y. Lau, K. K. Tsang, M. Bouchard, A. Edalatmand, W.
- 743 Huynh, A. V. Nguyen, A. A. Cheng, S. Liu, S. Y. Min, A. Miroshnichenko, H. K. Tran, R. E.
- 744 Werfalli, J. A. Nasir, M. Oloni, D. J. Speicher, A. Florescu, B. Singh, M. Faltyn, A. Hernandez-
- 745 Koutoucheva, A. N. Sharma, E. Bordeleau, A. C. Pawlowski, H. L. Zubyk, D. Dooley, E.
- 746 Griffiths, F. Maguire, G. L. Winsor, R. G. Beiko, F. S. L. Brinkman, W. W. L. Hsiao, G. V.
- 747 Domselaar and A. G. McArthur (2020). "CARD 2020: antibiotic resistance surveillance with the
- 748 comprehensive antibiotic resistance database." Nucleic Acids Res **48**(D1): D517-D525.
- 749 Anisimova, M. and O. Gascuel (2006). "Approximate likelihood-ratio test for branches: A fast,
- 750 accurate, and powerful alternative." Syst Biol **55**(4): 539-552.
- 751 Arndt, D., J. R. Grant, A. Marcu, T. Sajed, A. Pon, Y. Liang and D. S. Wishart (2016).
- 752 "PHASTER: a better, faster version of the PHAST phage search tool." Nucleic Acids Res
- 753 **44**(W1): W16-21.
- 754 Aslam, S., E. Lampley, D. Wooten, M. Karris, C. Benson, S. Strathdee and R. T. Schooley
- 755 (2020). "Lessons Learned From the First 10 Consecutive Cases of Intravenous Bacteriophage
- 756 Therapy to Treat Multidrug-Resistant Bacterial Infections at a Single Center in the United
- 757 States." Open Forum Infect Dis **7**(9): ofaa389.
- 758 Bankevich, A., S. Nurk, D. Antipov, A. A. Gurevich, M. Dvorkin, A. S. Kulikov, V. M. Lesin, S.
- 759 I. Nikolenko, S. Pham, A. D. Prjibelski, A. V. Pyshkin, A. V. Sirotkin, N. Vyahhi, G. Tesler, M.
- 760 A. Alekseyev and P. A. Pevzner (2012). "SPAdes: a new genome assembly algorithm and its
- 761 applications to single-cell sequencing." J Comput Biol **19**(5): 455-477.
- 762 Bartual, S. G., J. M. Otero, C. Garcia-Doval, A. L. Llamas-Saiz, R. Kahn, G. C. Fox and M. J.
- 763 van Raaij (2010). "Structure of the bacteriophage T4 long tail fiber receptor-binding tip." Proc
- 764 Natl Acad Sci U S A **107**(47): 20287-20292.
- 765 Billing, E. (1960). "An association between capsulation and phage sensitivity in *Erwinia*
- 766 *amylovora*." Nature **186**: 819-820.
- 767 Blankenberg, D., A. Gordon, G. Von Kuster, N. Coraor, J. Taylor, A. Nekrutenko and T. Galaxy
- 768 (2010). "Manipulation of FASTQ data with Galaxy." Bioinformatics **26**(14): 1783-1785.
- 769 Bolger, A. M., M. Lohse and B. Usadel (2014). "Trimmomatic: a flexible trimmer for Illumina
- 770 sequence data." Bioinformatics **30**(15): 2114-2120.
- 771 Cahill, J. and R. Young (2019). "Phage Lysis: Multiple Genes for Multiple Barriers." Adv Virus
- 772 Res **103**: 33-70.

773 Camacho, C., G. Coulouris, V. Avagyan, N. Ma, J. Papadopoulos, K. Bealer and T. L. Madden  
774 (2009). "BLAST+: architecture and applications." *BMC Bioinformatics* **10**: 421.  
775 CDC (2019). "ANTIBIOTIC RESISTANCE THREATS IN THE UNITED STATES."  
776 <https://www.cdc.gov/drugresistance/biggest-threats.html>.  
777 Chevenet, F., C. Brun, A. L. Banuls, B. Jacq and R. Christen (2006). "TreeDyn: towards  
778 dynamic graphics and annotations for analyses of trees." *BMC Bioinformatics* **7**: 439.  
779 Chusri, S., V. Chongsuvivatwong, J. I. Rivera, K. Silpapojakul, K. Singkhamanan, E. McNeil  
780 and Y. Doi (2014). "Clinical outcomes of hospital-acquired infection with *Acinetobacter*  
781 *nosocomialis* and *Acinetobacter pittii*." *Antimicrob Agents Chemother* **58**(7): 4172-4179.  
782 Darling, A. E., B. Mau and N. T. Perna (2010). "progressiveMauve: multiple genome alignment  
783 with gene gain, loss and rearrangement." *PLoS One* **5**(6): e11147.  
784 Delcher, A. L., D. Harmon, S. Kasif, O. White and S. L. Salzberg (1999). "Improved microbial  
785 gene identification with GLIMMER." *Nucleic Acids Res* **27**(23): 4636-4641.  
786 Dereeper, A., V. Guignon, G. Blanc, S. Audic, S. Buffet, F. Chevenet, J. F. Dufayard, S.  
787 Guindon, V. Lefort, M. Lescot, J. M. Claverie and O. Gascuel (2008). "Phylogeny.fr: robust  
788 phylogenetic analysis for the non-specialist." *Nucleic Acids Res* **36**(Web Server issue): W465-  
789 469.  
790 Dijkshoorn, L., A. Nemec and H. Seifert (2007). "An increasing threat in hospitals: multidrug-  
791 resistant *Acinetobacter baumannii*." *Nat Rev Microbiol* **5**(12): 939-951.  
792 Domingues, S., N. Rosario, A. Candido, D. Neto, K. M. Nielsen and G. J. Da Silva (2019).  
793 "Competence for Natural Transformation Is Common among Clinical Strains of Resistant  
794 *Acinetobacter* spp." *Microorganisms* **7**(2).  
795 Dunn, N. A., D. R. Unni, C. Diesh, M. Munoz-Torres, N. L. Harris, E. Yao, H. Rasche, I. H.  
796 Holmes, C. G. Elisk and S. E. Lewis (2019). "Apollo: Democratizing genome annotation." *PLoS*  
797 *Comput Biol* **15**(2): e1006790.  
798 Edgar, R. C. (2004). "MUSCLE: multiple sequence alignment with high accuracy and high  
799 throughput." *Nucleic Acids Res* **32**(5): 1792-1797.  
800 Garneau, J. R., F. Depardieu, L. C. Fortier, D. Bikard and M. Monot (2017). "PhageTerm: a tool  
801 for fast and accurate determination of phage termini and packaging mechanism using next-  
802 generation sequencing data." *Sci Rep* **7**(1): 8292.  
803 Gordillo Altamirano, F., J. H. Forsyth, R. Patwa, X. Kostoulias, M. Trim, D. Subedi, S. K.  
804 Archer, F. C. Morris, C. Oliveira, L. Kielty, D. Korneev, M. K. O'Bryan, T. J. Lithgow, A. Y.  
805 Peleg and J. J. Barr (2021). "Bacteriophage-resistant *Acinetobacter baumannii* are resensitized to  
806 antimicrobials." *Nat Microbiol* **6**(2): 157-161.  
807 Gordillo Altamirano, F. L. and J. J. Barr (2019). "Phage Therapy in the Postantibiotic Era." *Clin*  
808 *Microbiol Rev* **32**(2).  
809 Hamidian, M., L. Blasco, L. N. Tillman, J. To, M. Tomas and G. S. A. Myers (2020). "Analysis  
810 of Complete Genome Sequence of *Acinetobacter baumannii* Strain ATCC 19606 Reveals Novel  
811 Mobile Genetic Elements and Novel Prophage." *Microorganisms* **8**(12).  
812 Harding, C. M., S. W. Hennon and M. F. Feldman (2018). "Uncovering the mechanisms of  
813 *Acinetobacter baumannii* virulence." *Nat Rev Microbiol* **16**(2): 91-102.  
814 Hernandez-Morales, A. C., L. L. Lessor, T. L. Wood, D. Migl, E. M. Mijalis, J. Cahill, W. K.  
815 Russell, R. F. Young and J. J. Gill (2018). "Genomic and Biochemical Characterization of  
816 *Acinetobacter* Podophage Petty Reveals a Novel Lysis Mechanism and Tail-Associated  
817 Depolymerase Activity." *J Virol* **92**(6).

818 Holt, A., J. Cahill, J. Ramsey, C. Martin, C. O'Leary, R. Moreland, L. T. Maddox, T. Galbadage,  
819 R. Sharan, P. Sule, J. D. Cirillo and R. Young (2021). "Phage-encoded cationic antimicrobial  
820 peptide required for lysis." *J Bacteriol*: JB0021421.  
821 Hyman, P. and M. van Raaij (2018). "Bacteriophage T4 long tail fiber domains." *Biophys Rev*  
822 **10**(2): 463-471.  
823 Jalili, V., E. Afgan, Q. Gu, D. Clements, D. Blankenberg, J. Goecks, J. Taylor and A.  
824 Nekrutenko (2020). "The Galaxy platform for accessible, reproducible and collaborative  
825 biomedical analyses: 2020 update." *Nucleic Acids Res* **48**(W1): W395-W402.  
826 Jolley, K. A., J. E. Bray and M. C. J. Maiden (2018). "Open-access bacterial population  
827 genomics: BIGSdb software, the PubMLST.org website and their applications." *Wellcome Open*  
828 *Res* **3**: 124.  
829 Jones, P., D. Binns, H. Y. Chang, M. Fraser, W. Li, C. McAnulla, H. McWilliam, J. Maslen, A.  
830 Mitchell, G. Nuka, S. Pesseat, A. F. Quinn, A. Sangrador-Vegas, M. Scheremetjew, S. Y. Yong,  
831 R. Lopez and S. Hunter (2014). "InterProScan 5: genome-scale protein function classification."  
832 *Bioinformatics* **30**(9): 1236-1240.  
833 Kongari, R., M. Rajaure, J. Cahill, E. Rasche, E. Mijalis, J. Berry and R. Young (2018). "Phage  
834 spanins: diversity, topological dynamics and gene convergence." *BMC Bioinformatics* **19**(1):  
835 326.  
836 Krieger, I. V., V. Kuznetsov, J. Y. Chang, J. Zhang, S. H. Moussa, R. F. Young and J. C.  
837 Sacchettini (2020). "The Structural Basis of T4 Phage Lysis Control: DNA as the Signal for  
838 Lysis Inhibition." *J Mol Biol* **432**(16): 4623-4636.  
839 Krogh, A., B. Larsson, G. von Heijne and E. L. Sonnhammer (2001). "Predicting transmembrane  
840 protein topology with a hidden Markov model: application to complete genomes." *J Mol Biol*  
841 **305**(3): 567-580.  
842 Labrador-Herrera, G., A. J. Perez-Pulido, R. Alvarez-Marin, C. S. Casimiro-Soriguer, T.  
843 Cebrero-Cangueiro, J. Moran-Barrio, J. Pachon, A. M. Viale and M. E. Pachon-Ibanez (2020).  
844 "Virulence role of the outer membrane protein CarO in carbapenem-resistant *Acinetobacter*  
845 *baumannii*." *Virulence* **11**(1): 1727-1737.  
846 Langmead, B. and S. L. Salzberg (2012). "Fast gapped-read alignment with Bowtie 2." *Nat*  
847 *Methods* **9**(4): 357-359.  
848 Langmead, B., C. Trapnell, M. Pop and S. L. Salzberg (2009). "Ultrafast and memory-efficient  
849 alignment of short DNA sequences to the human genome." *Genome Biol* **10**(3): R25.  
850 Laslett, D. and B. Canback (2004). "ARAGORN, a program to detect tRNA genes and tmRNA  
851 genes in nucleotide sequences." *Nucleic Acids Res* **32**(1): 11-16.  
852 Lee, C. R., J. H. Lee, M. Park, K. S. Park, I. K. Bae, Y. B. Kim, C. J. Cha, B. C. Jeong and S. H.  
853 Lee (2017). "Biology of *Acinetobacter baumannii*: Pathogenesis, Antibiotic Resistance  
854 Mechanisms, and Prospective Treatment Options." *Front Cell Infect Microbiol* **7**: 55.  
855 Lee, I. M., I. F. Tu, F. L. Yang, T. P. Ko, J. H. Liao, N. T. Lin, C. Y. Wu, C. T. Ren, A. H.  
856 Wang, C. M. Chang, K. F. Huang and S. H. Wu (2017). "Structural basis for fragmenting the  
857 exopolysaccharide of *Acinetobacter baumannii* by bacteriophage PhiAB6 tailspike protein." *Sci*  
858 *Rep* **7**: 42711.  
859 Madeira, F., Y. M. Park, J. Lee, N. Buso, T. Gur, N. Madhusoodanan, P. Basutkar, A. R. N.  
860 Tivey, S. C. Potter, R. D. Finn and R. Lopez (2019). "The EMBL-EBI search and sequence  
861 analysis tools APIs in 2019." *Nucleic Acids Res* **47**(W1): W636-W641.  
862 Miller, E. S., E. Kutter, G. Mosig, F. Arisaka, T. Kunisawa and W. Ruger (2003).  
863 "Bacteriophage T4 genome." *Microbiol Mol Biol Rev* **67**(1): 86-156, table of contents.

864 Mussi, M. A., A. S. Limansky and A. M. Viale (2005). "Acquisition of resistance to  
865 carbapenems in multidrug-resistant clinical strains of *Acinetobacter baumannii*: natural  
866 insertional inactivation of a gene encoding a member of a novel family of beta-barrel outer  
867 membrane proteins." *Antimicrob Agents Chemother* **49**(4): 1432-1440.

868 Nobrega, F. L., M. Vlot, P. A. de Jonge, L. L. Dreesens, H. J. E. Beaumont, R. Lavigne, B. E.  
869 Dutilh and S. J. J. Brouns (2018). "Targeting mechanisms of tailed bacteriophages." *Nat Rev*  
870 *Microbiol* **16**(12): 760-773.

871 Noguchi, H., T. Taniguchi and T. Itoh (2008). "MetaGeneAnnotator: detecting species-specific  
872 patterns of ribosomal binding site for precise gene prediction in anonymous prokaryotic and  
873 phage genomes." *DNA Res* **15**(6): 387-396.

874 Peleg, A. Y., H. Seifert and D. L. Paterson (2008). "*Acinetobacter baumannii*: emergence of a  
875 successful pathogen." *Clin Microbiol Rev* **21**(3): 538-582.

876 Popova, A. V., D. G. Lavysh, E. I. Klimuk, M. V. Edelstein, A. G. Bogun, M. M. Shneider, A. E.  
877 Goncharov, S. V. Leonov and K. V. Severinov (2017). "Novel Fri1-like Viruses Infecting  
878 *Acinetobacter baumannii*-vB\_AbaP\_AS11 and vB\_AbaP\_AS12-Characterization, Comparative  
879 Genomic Analysis, and Host-Recognition Strategy." *Viruses* **9**(7).

880 Ramsey, J., H. Rasche, C. Maughmer, A. Criscione, E. Mijalis, M. Liu, J. C. Hu, R. Young and  
881 J. J. Gill (2020). "Galaxy and Apollo as a biologist-friendly interface for high-quality  
882 cooperative phage genome annotation." *PLoS Comput Biol* **16**(11): e1008214.

883 Regeimbal, J. M., A. C. Jacobs, B. W. Corey, M. S. Henry, M. G. Thompson, R. L. Pavlicek, J.  
884 Quinones, R. M. Hannah, M. Ghebremedhin, N. J. Crane, D. V. Zurawski, N. C. Teneza-Mora,  
885 B. Biswas and E. R. Hall (2016). "Personalized Therapeutic Cocktail of Wild Environmental  
886 Phages Rescues Mice from *Acinetobacter baumannii* Wound Infections." *Antimicrob Agents*  
887 *Chemother* **60**(10): 5806-5816.

888 Roca, I., P. Espinal, X. Vila-Farres and J. Vila (2012). "The *Acinetobacter baumannii*  
889 Oxymoron: Commensal Hospital Dweller Turned Pan-Drug-Resistant Menace." *Front Microbiol*  
890 **3**: 148.

891 Schooley, R. T., B. Biswas, J. J. Gill, A. Hernandez-Morales, J. Lancaster, L. Lessor, J. J. Barr,  
892 S. L. Reed, F. Rohwer, S. Benler, A. M. Segall, R. Taplitz, D. M. Smith, K. Kerr, M.  
893 Kumaraswamy, V. Nizet, L. Lin, M. D. McCauley, S. A. Strathdee, C. A. Benson, R. K. Pope, B.  
894 M. Leroux, A. C. Picel, A. J. Mateczun, K. E. Cilwa, J. M. Regeimbal, L. A. Estrella, D. M.  
895 Wolfe, M. S. Henry, J. Quinones, S. Salka, K. A. Bishop-Lilly, R. Young and T. Hamilton  
896 (2017). "Development and Use of Personalized Bacteriophage-Based Therapeutic Cocktails To  
897 Treat a Patient with a Disseminated Resistant *Acinetobacter baumannii* Infection." *Antimicrob*  
898 *Agents Chemother* **61**(10).

899 Shashkov, A. S., S. M. Cahill, N. P. Arbatsky, A. C. Westacott, A. A. Kasimova, M. M.  
900 Shneider, A. V. Popova, D. A. Shagin, A. A. Shelenkov, Y. V. Mikhailova, Y. G. Yanushevich,  
901 M. V. Edelstein, J. J. Kenyon and Y. A. Knirel (2019). "*Acinetobacter baumannii* K116 capsular  
902 polysaccharide structure is a hybrid of the K14 and revised K37 structures." *Carbohydr Res* **484**:  
903 107774.

904 Singh, J. K., F. G. Adams and M. H. Brown (2018). "Diversity and Function of Capsular  
905 Polysaccharide in *Acinetobacter baumannii*." *Front Microbiol* **9**: 3301.

906 Snitkin, E. S., A. M. Zelazny, C. I. Montero, F. Stock, L. Mijares, N. C. S. Program, P. R.  
907 Murray and J. A. Segre (2011). "Genome-wide recombination drives diversification of epidemic  
908 strains of *Acinetobacter baumannii*." *Proc Natl Acad Sci U S A* **108**(33): 13758-13763.



909 Summer, E. J. (2009). "Preparation of a phage DNA fragment library for whole genome shotgun  
910 sequencing." Methods Mol Biol **502**: 27-46.

911 Tatusova, T., M. DiCuccio, A. Badretdin, V. Chetvermin, E. P. Nawrocki, L. Zaslavsky, A.  
912 Lomsadze, K. D. Pruitt, M. Borodovsky and J. Ostell (2016). "NCBI prokaryotic genome  
913 annotation pipeline." Nucleic Acids Res **44**(14): 6614-6624.

914 UniProt Consortium, T. (2018). "UniProt: the universal protein knowledgebase." Nucleic Acids  
915 Res **46**(5): 2699.

916 Uppalapati, S. R., A. Sett and R. Pathania (2020). "The Outer Membrane Proteins OmpA, CarO,  
917 and OprD of *Acinetobacter baumannii* Confer a Two-Pronged Defense in Facilitating Its Success  
918 as a Potent Human Pathogen." Front Microbiol **11**: 589234.

919 Vaas, L. A., J. Sikorski, B. Hofner, A. Fiebig, N. Buddruhs, H. P. Klenk and M. Goker (2013).  
920 "opm: an R package for analysing OmniLog(R) phenotype microarray data." Bioinformatics  
921 **29**(14): 1823-1824.

922 Walker, B. J., T. Abeel, T. Shea, M. Priest, A. Abouelliel, S. Sakthikumar, C. A. Cuomo, Q.  
923 Zeng, J. Wortman, S. K. Young and A. M. Earl (2014). "Pilon: an integrated tool for  
924 comprehensive microbial variant detection and genome assembly improvement." PLoS One  
925 **9**(11): e112963.

926 Wick, R. R., E. Heinz, K. E. Holt and K. L. Wyres (2018). "Kaptive Web: User-Friendly Capsule  
927 and Lipopolysaccharide Serotype Prediction for *Klebsiella* Genomes." J Clin Microbiol **56**(6).

928 Wilharm, G., J. Piesker, M. Laue and E. Skiebe (2013). "DNA uptake by the nosocomial  
929 pathogen *Acinetobacter baumannii* occurs during movement along wet surfaces." J Bacteriol  
930 **195**(18): 4146-4153.

931 Wyres, K. L., S. M. Cahill, K. E. Holt, R. M. Hall and J. J. Kenyon (2020). "Identification of  
932 *Acinetobacter baumannii* loci for capsular polysaccharide (KL) and lipooligosaccharide outer  
933 core (OCL) synthesis in genome assemblies using curated reference databases compatible with  
934 Kaptive." Microb Genom **6**(3).

935 Young, K. K., G. J. Edlin and G. G. Wilson (1982). "Genetic analysis of bacteriophage T4  
936 transducing bacteriophages." J Virol **41**(1): 345-347.

937 Young, R. and J. J. Gill (2015). "MICROBIOLOGY. Phage therapy redux--What is to be done?"  
938 Science **350**(6265): 1163-1164.

939
